# Supplementary material
Source: HighWire-hosted journal article supplement (https://ajnr-sso.highwirestaging.com/highwire/filestream/89556/field_highwire_adjunct_files/0/1382.pdf)
Supplement: 1382.pdf [file 1382.pdf]

## Data Supplement

### TABLES

**On-line Table 1: Search Strategies**

| <b>Databse</b>      | <b>Search Strategy</b>                                                                                                                                                                                                                                                                                                                                                                                                                                                                                                                                                                                                                                                                                                   |
|---------------------|--------------------------------------------------------------------------------------------------------------------------------------------------------------------------------------------------------------------------------------------------------------------------------------------------------------------------------------------------------------------------------------------------------------------------------------------------------------------------------------------------------------------------------------------------------------------------------------------------------------------------------------------------------------------------------------------------------------------------|
| <b>Pubmed</b>       | ((((((((((("gender identity"[MeSH Terms] OR ("gender"[All Fields] AND "identity"[All Fields])) OR "gender identity"[All Fields]) OR "gendered"[All Fields]) OR "gender s"[All Fields]) OR "gendering"[All Fields]) OR "genderized"[All Fields]) OR "genders"[All Fields]) OR "sex"[MeSH Terms]) OR "sex"[All Fields]) OR "gender"[All Fields]) OR ("sex"[MeSH Terms] OR "sex"[All Fields])) AND (((("mechanical"[All Fields] OR "mechanically"[All Fields]) OR "mechanicals"[All Fields]) OR "mechanics"[MeSH Terms]) OR "mechanics"[All Fields]) OR "mechanic"[All Fields]) OR "endovascular"[All Fields])) AND (((("stroke"[MeSH Terms] OR "stroke"[All Fields]) OR "strokes"[All Fields]) OR "stroke s"[All Fields])) |
| <b>OVID Medline</b> | (( <a href="#">stroke.kw</a> ) AND (thrombectomy OR endovascular OR ADAPT).kw) OR ((stroke.sh) AND (thrombectomy OR endovascular OR ADAPT).sh) - limit to (English language and humans)                                                                                                                                                                                                                                                                                                                                                                                                                                                                                                                                  |
| <b>CCTR</b>         | (stroke) in Title Abstract Keyword AND (thrombectomy OR endovascular OR ADAPT) in Title Abstract Keyword                                                                                                                                                                                                                                                                                                                                                                                                                                                                                                                                                                                                                 |
| <b>DARE</b>         | (stroke)) OR ((endovascular OR thrombectomy OR ADAPT))                                                                                                                                                                                                                                                                                                                                                                                                                                                                                                                                                                                                                                                                   |
|                     |                                                                                                                                                                                                                                                                                                                                                                                                                                                                                                                                                                                                                                                                                                                          |

**On-line Table 2:** Newcastle Ottawa Assessment Scale for Cohort Studies for the observational studies

| Author                   | Title                                                                                                                                                                                                  | Year | Selection /4 | Comparability /2 | Exposure/Outcome /3 | Newcastle Ottawa Scale /9 |
|--------------------------|--------------------------------------------------------------------------------------------------------------------------------------------------------------------------------------------------------|------|--------------|------------------|---------------------|---------------------------|
| Bai et al.               | Impact of Retriever Passes on Efficacy and Safety Outcomes of Acute Ischemic Stroke Treated with Mechanical Thrombectomy                                                                               | 2018 | 4            | 2                | 3                   | 9                         |
| Barral et al.            | Predictors of favorable outcome after mechanical thrombectomy for anterior circulation acute ischemic stroke in octogenarians                                                                          | 2018 | 4            | 2                | 3                   | 9                         |
| Brouwer et al.           | Thrombectomy using the EmboTrap device: Core laboratory-assessed results in 201 consecutive patients in a real-world setting                                                                           | 2018 | 4            | 2                | 2                   | 8                         |
| Carvalho et al.          | Is the Efficacy of Endovascular Treatment for Acute Ischemic Stroke Sex-Related                                                                                                                        | 2018 | 4            | 2                | 3                   | 9                         |
| Choi, Im et al.          | Comparison of Outcomes After Mechanical Thrombectomy Alone or Combined with Intravenous Thrombolysis and Mechanical Thrombectomy for Patients with Acute Ischemic Stroke due to Large Vessel Occlusion | 2018 | 4            | 2                | 3                   | 9                         |
| Davison et al.           | Arterial diameter and the gender disparity in stroke thrombectomy outcomes                                                                                                                             | 2018 | 4            | 2                | 3                   | 9                         |
| Gory et al.              | Contact Aspiration with the New ARC Catheter for Thrombectomy of Acute Ischemic Stroke: Single-Center Results                                                                                          | 2018 | 4            | 0                | 3                   | 7                         |
| Blanc et al.             | Predictors of the Aspiration Component Success of a Direct Aspiration First Pass Technique (ADAPT) for the Endovascular Treatment of Stroke Reperfusion Strategy in Anterior Circulation Acute Stroke  | 2017 | 4            | 2                | 3                   | 9                         |
| Angermaier et al.        | Intravenous Thrombolysis and Passes of Thrombectomy as Predictors for Endovascular Revascularization in Ischemic Stroke                                                                                | 2016 | 4            | 2                | 2                   | 8                         |
| Gerber et a.             | Collateral state and the effect of endovascular reperfusion therapy on clinical outcome in ischemic stroke patients                                                                                    | 2016 | 4            | 2                | 3                   | 9                         |
|                          |                                                                                                                                                                                                        |      |              |                  |                     |                           |
| Goyal, Tsivgoulis et al. | Admission hyperglycemia and outcomes in large vessel occlusion strokes treated with mechanical thrombectomy                                                                                            | 2018 | 4            | 2                | 3                   | 9                         |

|                             |                                                                                                                                                                            |      |   |   |   |   |
|-----------------------------|----------------------------------------------------------------------------------------------------------------------------------------------------------------------------|------|---|---|---|---|
| Hussein et al.              | Rates and predictors of futile recanalization in patients undergoing endovascular treatment in a multicenter clinical trial                                                | 2018 | 4 | 2 | 3 | 9 |
| Imahori et al.              | Mechanical Thrombectomy for Acute Ischemic Stroke Patients Aged 80 Years or Older                                                                                          | 2017 | 4 | 2 | 2 | 8 |
| Jiang et al.                | Predictors of Outcome and Hemorrhage in Patients Undergoing Endovascular Therapy with Solitaire Stent for Acute Ischemic Stroke                                            | 2015 | 4 | 2 | 3 | 9 |
| Kabra et al.                | Mechanical thrombectomy for anterior circulation stroke: 5-year experience in a statewide service with differences in pretreatment time metrics across two hospitals sites | 2017 | 4 | 2 | 3 | 9 |
| Kim et al.                  | Clinical implications of CT hyperdense artery sign in patients with acute middle cerebral artery occlusion in the era of modern mechanical thrombectomy                    | 2017 | 4 | 2 | 3 | 9 |
| Kuntze et al.               | Mechanical Thrombectomy in Acute Ischemic Stroke-Patients with Wake-Up Stroke and the Elderly May Benefit as Well                                                          | 2016 | 4 | 2 | 3 | 9 |
| Lima et al.                 | Endovascular Therapy for Large Vessel Stroke in the Elderly: Hope in the New Stroke Era. Cerebrovascular Diseases                                                          | 2016 | 4 | 2 | 3 | 9 |
| Linfante, Starosciak et al. | Predictors of poor outcome despite recanalization: a multiple regression analysis of the NASA registry                                                                     | 2016 | 4 | 2 | 3 | 9 |
| Lowhagen Henden et al.      | Hypotension During Endovascular Treatment of Ischemic Stroke Is a Risk Factor for Poor Neurological Outcome                                                                | 2015 | 4 | 2 | 3 | 9 |
| Madsen et al.               | Sex differences in 90-day outcomes after mechanical thrombectomy for acute ischemic stroke                                                                                 | 2018 | 4 | 2 | 3 | 9 |
| Manceau et al               | Is there a benefit of mechanical thrombectomy in patients with large stroke (DWI-ASPECTS <= 5)?                                                                            | 2018 | 4 | 2 | 3 | 9 |
| Mokin, Kan et al            | Endovascular therapy of wake-up strokes in the modern era of stent retriever thrombectomy                                                                                  | 2016 | 4 | 2 | 3 | 9 |
| Mokin, Primiani et al       | Endovascular treatment of middle cerebral artery M2 occlusion strokes: Clinical and procedural predictors of outcomes                                                      | 2017 | 4 | 2 | 3 | 9 |
| Mundiyanapurath et al       | Endovascular stroke therapy may be safe in patients with elevated international normalized ratio                                                                           | 2017 | 4 | 2 | 3 | 9 |
| Sillanpaa et al.            | Chronic Infarcts Predict Poor Clinical Outcome in Mechanical Thrombectomy of Sexagenarian and Older Patients                                                               | 2018 | 4 | 2 | 3 | 9 |
| Sung et al                  | Clinical predictors for favorable outcomes from endovascular recanalization in wake-up stroke                                                                              | 2017 | 4 | 2 | 3 | 9 |
| Sung et al                  | Functional outcome after recanalization for acute pure M1 occlusion of the middle cerebral artery as assessed by collateral CTA flow                                       | 2015 | 4 | 2 | 3 | 9 |
| Todo et al                  | National Institutes of Health Stroke Scale-Time Score Predicts Outcome after Endovascular Therapy in Acute Ischemic Stroke: A Retrospective Single-Center Study            | 2016 | 4 | 2 | 3 | 9 |

|              |                                                                                                                              |      |   |   |   |   |
|--------------|------------------------------------------------------------------------------------------------------------------------------|------|---|---|---|---|
| Zi et al     | Clinical Effectiveness and Safety Outcomes of Endovascular Treatment for Acute Anterior Circulation Ischemic Stroke in China | 2017 | 4 | 2 | 3 | 9 |
| Uchida et al | Sex Differences in Management and Outcomes of Acute Ischemic Stroke With Large Vessel Occlusion                              | 2019 | 4 | 2 | 3 | 9 |

**On-line Table 3:** Cochrane Collaboration's tool for assessing risk of bias in Randomized Controlled Trials

| Author        | Title                                                                                                                | Year | Random sequence generation | Allocation | Blinding of outcome assessment | Incomplete outcome data | Selective reporting | Other bias | Overall Risk |
|---------------|----------------------------------------------------------------------------------------------------------------------|------|----------------------------|------------|--------------------------------|-------------------------|---------------------|------------|--------------|
| Chalos et al. | Does Sex Modify the Effect of Endovascular Treatment for Ischemic Stroke? A Subgroup Analysis of 7 Randomized Trials | 2019 | Yes                        | No         | Yes                            | Yes                     | Yes                 | No         | Low          |
| Albers et al. | Thrombectomy for Stroke at 6 to 16 Hours with Selection by Perfusion Imaging (DEFUSE 3)                              | 2018 | Yes                        | No         | Yes                            | Yes                     | Yes                 | No         | Low          |

**On-line Table 4: Summary characteristics of included studies**

| Study                         | Year | Country   | Study design  | Sample size | Female (%) | NIHSS score |
|-------------------------------|------|-----------|---------------|-------------|------------|-------------|
| Chalos et al. <sup>6</sup>    | 2019 | Worldwide | Meta-analysis | 871         | 47%        | /           |
| Uchida et al. <sup>7</sup>    | 2019 | Japan     | Prospective   | 1278        | 40.8       | 16          |
| Albers et al. <sup>20</sup>   | 2018 | USA       | Prospective   | 92          | 50.0       | 16          |
| Bai et al. <sup>21</sup>      | 2018 | China     | Retrospective | 472         | 44.7       | 17          |
| Barral et al. <sup>22</sup>   | 2018 | France    | Retrospective | 169         | 59.8       | 18          |
| Brouwer et al. <sup>23</sup>  | 2018 | France    | Prospective   | 201         | 43.3       | 15          |
| Carvalho et al. <sup>24</sup> | 2018 | Portugal  | Retrospective | 145         | 55.9       | /           |
| Choi et al. <sup>25</sup>     | 2018 | Korea     | Retrospective | 81          | 43.2       | /           |
| Davison et al. <sup>26</sup>  | 2018 | USA       | Retrospective | 92          | 45.7       | 20          |
| Gory et al. <sup>27</sup>     | 2018 | France    | Retrospective | 20          | 35.0       | 15          |
| Goyal et al. <sup>28</sup>    | 2018 | Worldwide | Retrospective | 231         | 49.0       | 16          |
| Hussein et al. <sup>29</sup>  | 2018 | Worldwide | Retrospective | 130         | 52.3       | /           |
| Madsen et al. <sup>30</sup>   | 2018 | USA       | Prospective   | 279         | 52.0       | 17          |

|                                      |      |                                     |               |     |      |    |
|--------------------------------------|------|-------------------------------------|---------------|-----|------|----|
| Manceau et al. <sup>31</sup>         | 2018 | France                              | Retrospective | 82  | 47.6 | 18 |
| Sillanpää et al. <sup>32</sup>       | 2018 | Finland                             | Prospective   | 62  | 47.0 | 15 |
| Blanc et al. <sup>33</sup>           | 2017 | France                              | Retrospective | 347 | 54.2 | 17 |
| Imahori et al. <sup>34</sup>         | 2017 | Japan                               | Retrospective | 80  | 46.0 | 15 |
| Kabra et al. <sup>35</sup>           | 2017 | Australia                           | Retrospective | 100 | 47.0 | 15 |
| Kim et al. <sup>36</sup>             | 2017 | Korea                               | Retrospective | 212 | 49.5 | 13 |
| Mokin et al. <sup>37</sup>           | 2017 | USA                                 | Retrospective | 117 | 42.0 | 15 |
| Mundiyanapurath et al. <sup>38</sup> | 2017 | Germany                             | Retrospective | 435 | 48.3 | 17 |
| Sung et al. <sup>39</sup>            | 2017 | Korea                               | Retrospective | 41  | 43.9 | 16 |
| Zi et al. <sup>40</sup>              | 2017 | China                               | Retrospective | 698 | 39.4 | 16 |
| Angermaier et al. <sup>41</sup>      | 2016 | Germany                             | Retrospective | 63  | 63.5 | /  |
| Gerber et al. <sup>42</sup>          | 2016 | Germany                             | Retrospective | 93  | 48.0 | 17 |
| Kuntze et al. <sup>43</sup>          | 2016 | Sweden                              | Retrospective | 192 | 45.8 | 16 |
| Lima et al. <sup>44</sup>            | 2016 | USA                                 | Retrospective | 111 | 67.0 | 19 |
| Linfante et al. <sup>45</sup>        | 2016 | Multiple countries in North America | Retrospective | 234 | 51.1 | /  |
| Mokin et al. <sup>46</sup>           | 2016 | USA                                 | Retrospective | 52  | 51.9 | /  |
| Todo et al. <sup>47</sup>            | 2016 | Japan                               | Retrospective | 128 | 33.6 | /  |
| Jiang et al. <sup>48</sup>           | 2015 | China                               | Retrospective | 89  | 38.2 | 19 |
| Lowhagen et al. <sup>49</sup>        | 2015 | Sweden                              | Retrospective | 108 | 38.9 | 21 |
| Sung et al. <sup>50</sup>            | 2015 | Korea                               | Retrospective | 30  | 43.3 | 17 |

**On-line Table 5: Assessment of risk of bias**

| Variable         | Egger's test | Begg and Mazumdar rank correlation test p-value (Kendall's tau) |
|------------------|--------------|-----------------------------------------------------------------|
| 90-day mortality | p=0.62       | 1.00 (0.0476)                                                   |
| Good outcome     | p=0.77       | 0.20 (0.1656)                                                   |
| sICH             | p=0.22       | 0.40 (-0.2857)                                                  |
| Recanalization   | p=0.83       | 0.86 (0.0667)                                                   |

**Note:** sICH, symptomatic intracranial hemorrhage.

## FIGURES

### Supplemental Figures

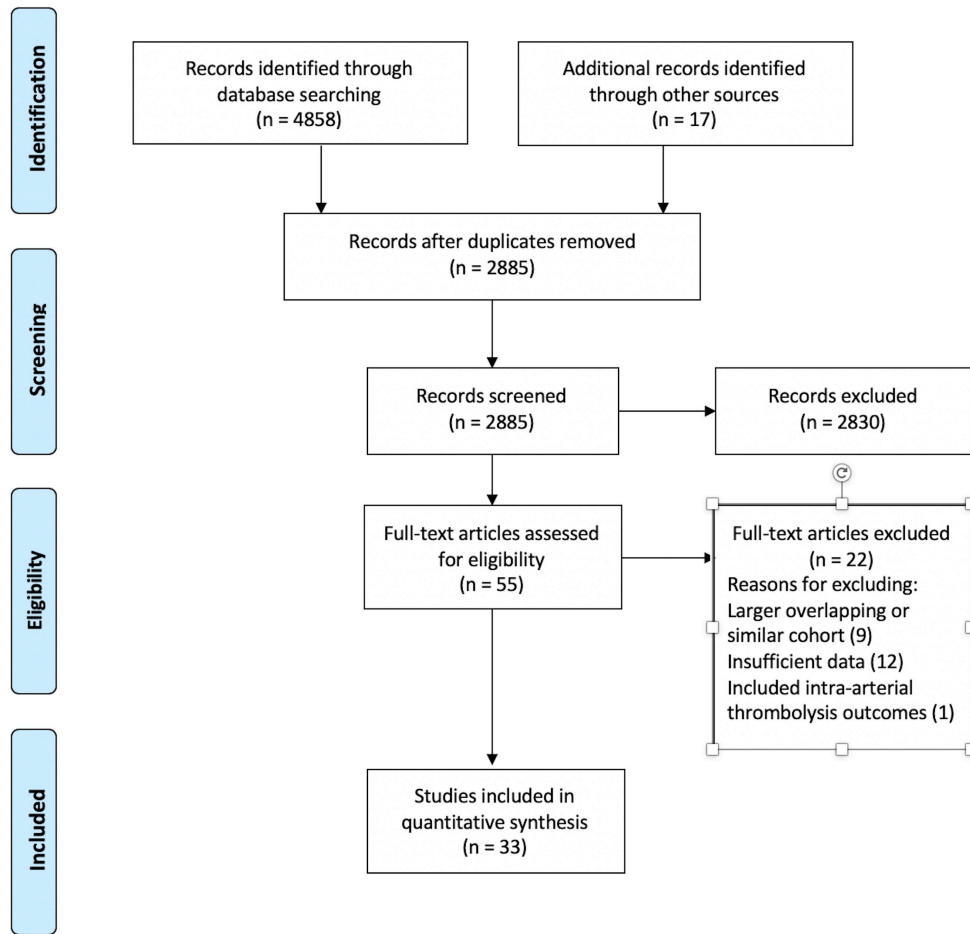

ON-LINE FIG 1. Flow diagram of study selection

A

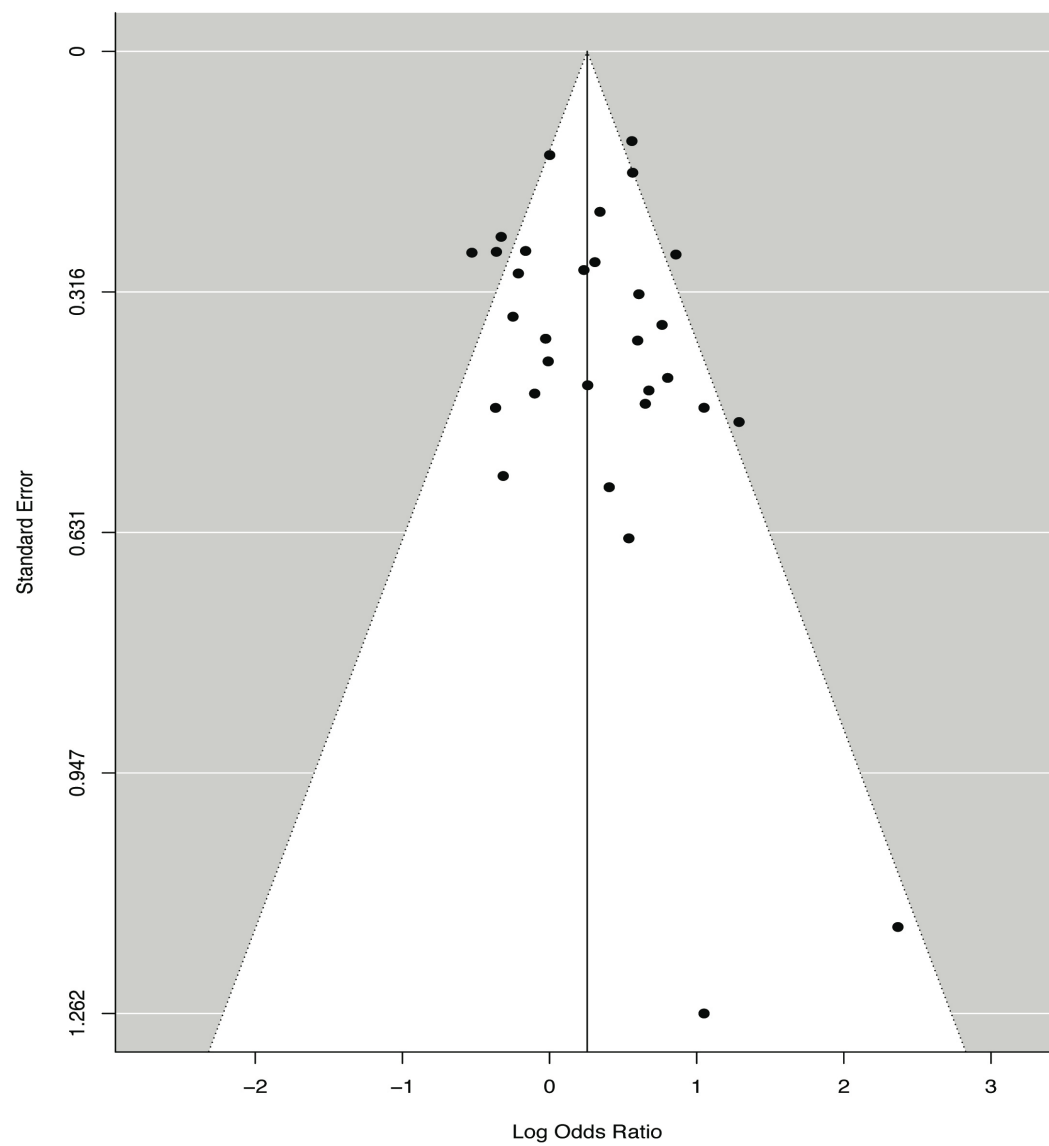

B

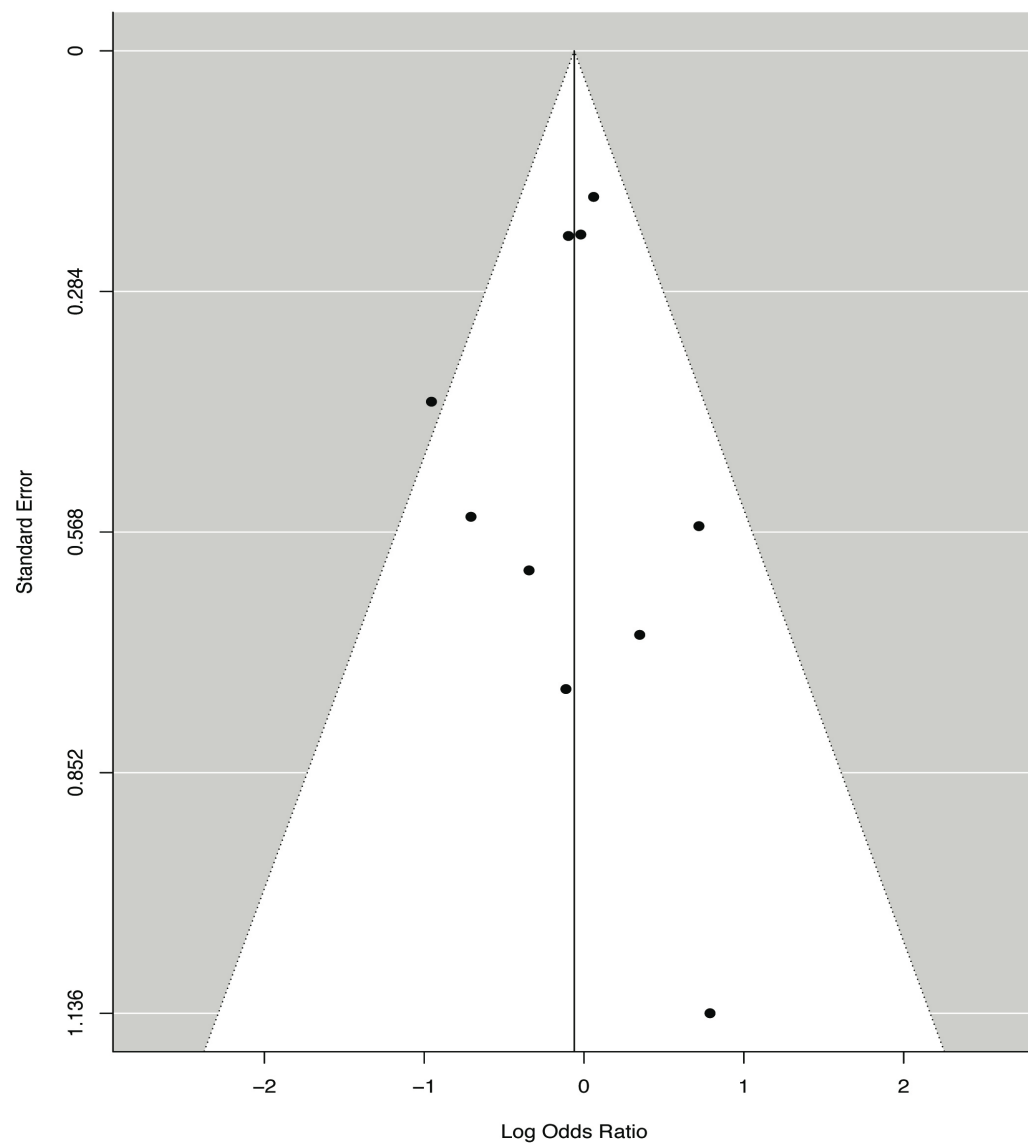



D

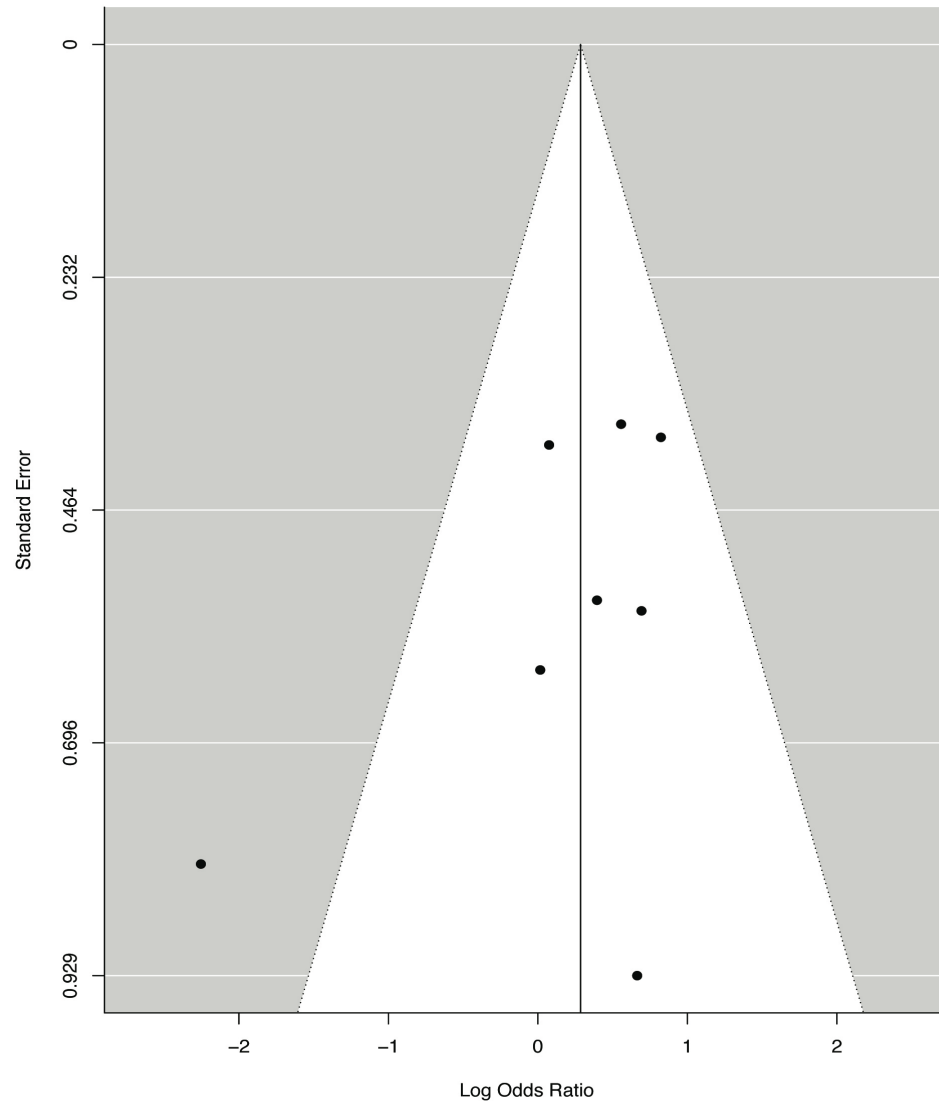

C

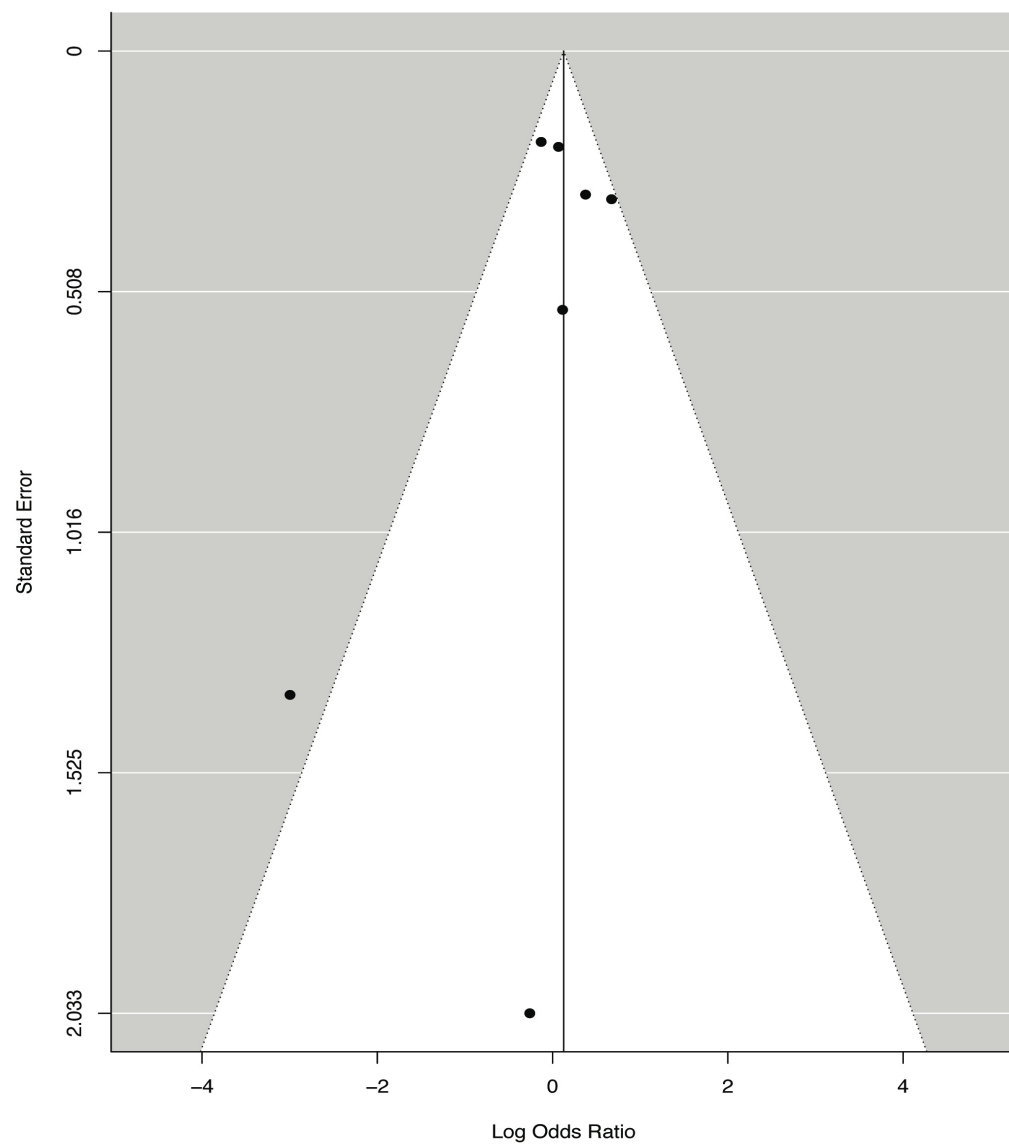

**ON-LINE FIG 2** Funnel plots to assess for publication bias A. Good outcome ( $mRS \leq 2$ ) at 90 days B. Recanalization ( $TICI \geq 2b$ ) C. Mortality at 90 days D. Symptomatic Intracranial Hemorrhage
